1        **Impact of Meteorological factors and population size on the**  
2        **transmission of Micro-size respiratory droplets based Coronavirus: A**  
3        **brief study of highly infected cities in Pakistan**

4        Iram Shahzadi<sup>a</sup>, Anum Shahzadi<sup>a</sup>, Junaid Haider<sup>b,c</sup>, Sadia Naz<sup>b,\*</sup>, Rai. M. Aamir<sup>d</sup>, Ali Haider<sup>e</sup>,  
5        Hafiz Rizwan Sharif<sup>f</sup>, Imran Mahmood Khan<sup>g</sup>, Muhammad Ikram<sup>h,\*</sup>

6  
7        <sup>a</sup>College of Pharmacy, University of the Punjab, Lahore 54000, Pakistan

8        <sup>b</sup>Tianjin Institute of Industrial Biotechnology, Chinese Academy of Sciences, Tianjin 300308, China

9        <sup>c</sup>University of Chinese Academy of Sciences, Beijing 100049, China

10        <sup>d</sup>Institute of Food and Nutritional Sciences, PMAS-Arid Agriculture University, Rawalpindi, 46300,  
11        Pakistan

12        <sup>e</sup>Department of Clinical Medicine and Surgery, University of Veterinary and Animal Sciences Lahore,  
13        54000, Punjab, Pakistan

14        <sup>f</sup>University Institute of Diet and Nutritional Sciences, The University of Lahore, Gujrat campus,  
15        Pakistan

16        <sup>g</sup>State Key Laboratory of Food Science and Technology, Jiangnan University, Wuxi, 214122, Jiangsu,  
17        China

18        <sup>h</sup>Solar Cell Applications Research Lab, Department of Physics, Government College University Lahore,  
19        54000, Punjab, Paksitan

20  
21        **\*Corresponding author:**

22        **1. Sadia Naz**

23        Tianjin Institute of Industrial Biotechnology,  
24        Chinese Academy of Sciences, Tianjin 300308, China.

25        E-mail address: [sadia@tib.cas.cn](mailto:sadia@tib.cas.cn)

26        **2. Muhammad Ikram**

27        Solar Cell Applications Research Lab, Department of Physics,  
28        Government College University Lahore, 54000, Punjab, Paksitan.

29        Tel., +923005406667.

30        E-mail address: [dr.muhammadiqram@gcu.edu.pk](mailto:dr.muhammadiqram@gcu.edu.pk)

## 31 **Abstract**

32 Ongoing Coronavirus epidemic (COVID-19) identified first in Wuhan, China posed huge impact  
33 on public health and economy around the globe. Both cough and sneeze based droplets or aerosols  
34 encapsulated COVID-19 particles are responsible for air borne transmission of this virus and  
35 caused unexpected escalation and high mortality worldwide. Current study intends to investigate  
36 correlation of COVID-19 epidemic with meteorological parameters particularly, temperature,  
37 rainfall, humidity, and wind speed along with population size. Data set of COVID-19 for highly  
38 infected cities of Pakistan was collected from the official website of National Institute of health  
39 (NIH). Spearman's rank ( $r_s$ ) correlation coefficient test employed for data analysis revealed  
40 significant correlation between temperature minimum (TM), temperature average (TA), wind  
41 speed (WS) and population size (PS) with COVID-19 pandemic. Furthermore, receiver operating  
42 characteristics (ROC) curve was used to analyze the sensitivity of TA, WS, and PS on transmission  
43 rate of COVID-19 in selected cities of Pakistan. The results obtained for sensitivity and specificity  
44 analysis for all selected parameters signifies sensitivity and direct correlation of COVID-19  
45 transmission with temperature variation, WS and PS. Positive correlation and strong association  
46 of PS parameter with COVID-19 pandemic suggested need of more strict actions and control  
47 measures for highly populated cities. These findings will be helpful for health regulatory  
48 authorities and policymakers to take specific measures to combat COVID-19 epidemic in Pakistan.

49 **Keywords:** COVID-19 epidemic, meteorological parameters, temperature, Spearman's rank  
50 correlation, Receiver operating characteristics (ROC), Pakistan

## 51 **1. Introduction:**

52 Recent outbreak of coronavirus disease characterized by pneumonia of unexplained  
53 etiology was first reported from Wuhan, China in December, 2019 that later spread globally (Li et  
54 al., 2020; Zhu et al., 2020). Coronavirus (COVID-19, or 2019-nCoV) epidemic posed huge impact  
55 on public health and economy all over the world and has been declared as public health emergency  
56 by World Health Organization (WHO) on January 30, 2020 (Rothan and Byrareddy, 2020). Later,  
57 International Committee on Taxonomy of Viruses named this novel coronavirus as severe acute  
58 respiratory syndrome coronavirus 2 (SARS-CoV-2) on 11<sup>th</sup> February 2020 (Yang and Wang,  
59 2020). The COVID-19 has more severe effects than Severe Acute Respiratory Syndrome (SARS)

60 and Middle East Respiratory Syndrome (MERS), although phylogenetically similar (Van  
61 Doremalen et al., 2013). Common symptoms of this pandemic include fever, cough, troubled  
62 breathing, fatigue, body pain and lesions on patient's lungs (Guan et al., 2020; Song et al., 2020).  
63 In severe conditions, patients suffer from viral pneumonia, diarrhea, acute cardiac injury and  
64 RNAemia (Huang et al., 2020). Nevertheless, recently few cases of corona virus have been  
65 claimed by Chinese government with no observed clinical symptoms (asymptomatic) of COVID-  
66 19 on May 18, 2020.

67 This pandemic has wrapped whole globe and effected 216 countries including Pakistan. In  
68 Pakistan, first 2 cases of Corona virus were confirmed by Federal Health Minister of Pakistan on  
69 Feb 26, 2020 in Islamabad and Karachi that arrived to twenty (14 in Sindh, 5 in Gilgit Baltistan, 1  
70 in Baluchistan in 12 yr. old boy) till March 12, 2020. History of these patients depicts their recent  
71 visit to Iran, London or Syria (Ali, 2020; Saqlain et al., 2020). Pakistan share borders with  
72 countries infected with COVID-19 namely, China, and Iran (Remuzzi and Remuzzi, 2020; Zhu et  
73 al., 2020). First coronavirus death from Pakistan was reported in Peshawar on March 18, 2020. Up  
74 to now, a total 1,372,825 tests, 225,282 confirmed cases and 4,619 deaths have been reported by  
75 NIH, and more than 54% of total confirmed cases of Pakistan are reported from three highly  
76 infected cities such as Karachi (70,143 cases), Lahore (41,416 cases) and Peshawar (11,134 cases)  
77 till July 4, 2020. To control this pandemic, the government of Pakistan has taken strict actions like  
78 screening of passengers traveling from other countries, restrict inter-city transportation, early  
79 detection of new cases, quarantine and restrict people mobility (Noreen et al.). In addition, people  
80 are advised to use facemasks, hand sanitizers and maintain a distance of one meter to avoid  
81 transmission of virus by direct contact (Organization, 2020; Saqlain et al., 2020).

82 In fact, spread of SARS-CoV-2 is attributed to three different routes of its transmission i.e. (a)  
83 Aerosol transmission in confined areas, (b) direct inhalation of large respiratory droplets with  
84 diameter ranged 5-10  $\mu\text{m}$  produced by cough or sneeze, (c) Direct contact with surfaces  
85 contaminated with virus (Lipsitch et al., 2020). Both, droplet and aerosol are two major routes for  
86 transmission of COVID-19 where viral particles spread through breath, sneeze and cough of an  
87 infected person. Droplets are large sized mucus or saliva globs (size  $> 5\mu\text{m}$ ) with virus  
88 encapsulated inside that fall in close proximity of their origin while aerosols are comparatively  
89 small sized particles (size  $< 5\mu\text{m}$ ) that transmit to larger distance and may lead to higher rate of

90 COVID-19 spread (Grayson et al., 2017; Liu et al., 2017), as depicted in Figure 1. Both cough and  
91 sneeze emit viral particles in the form of aerosol droplets where cough based particles having  
92 diameter  $< 20 \mu\text{m}$  quickly loss water and achieve diameter almost less than half of initial size  
93 (Nicas et al., 2005). Aerosol can survive in air for long time and can penetrate into alveolar region  
94 of lungs causing viral infection deep in alveolar tissues (Tellier, 2009). The distance travel by  
95 sneeze and cough based viral particles depends on the speed of droplet clouds, air flow,  
96 temperature and humidity of air i.e. larger droplets travel up to 2m (speed 10m/s) from initial point  
97 and up to 1m if emitted at speed of 1m/s while sneeze based droplets travel up to 7-8m (Xie et al.,  
98 2007). In addition, Bioaerosol also known as droplet nuclei have COVID-19 encapsulated inside  
99 particles released from expiratory activities of infected person with size in range of 4 to 8  $\mu\text{m}$  (i.e.  
100 95%  $< 100 \mu\text{m}$ ) and their viability lasts for 3 h (Jayaweera et al., 2020). Similarly, droplets of  
101 COVID-19 showed trend similar to other SARS viruses in terms of stability and survival on  
102 various surfaces where longest duration was reported for glass and plastic surface i.e. 84 h and 72  
103 h, respectively while shortest time of droplet's survival is 4 h in case of copper surface (Van  
104 Doremalen et al., 2020). Keeping in view its high rate of person to person transmission, series of  
105 actions have been recommended by WHO to restrict further spread of COVID-19 (Graham et al.,  
106 2013; Organization, 2020).

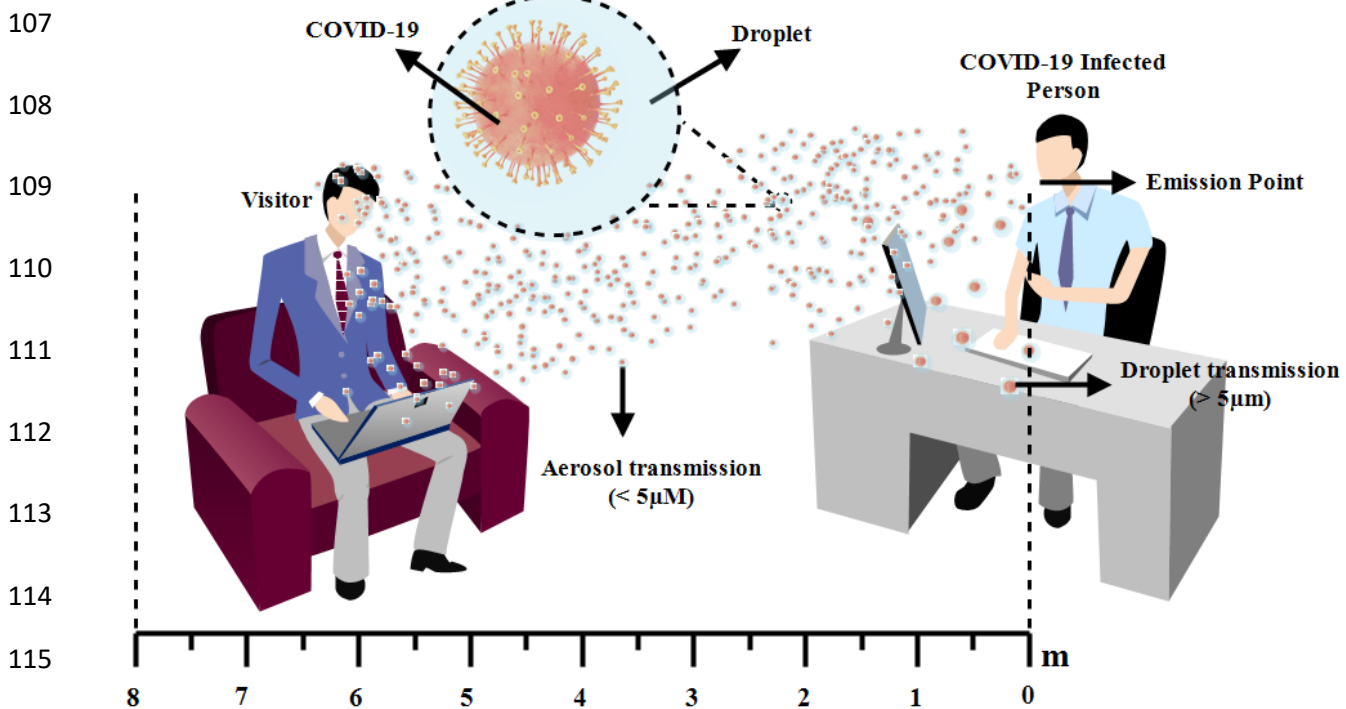

116 **Figure 1:** Trajectory of the transmission of COVID-19 by droplets and aerosols from an infected  
117 person.

118 Although spread of this viral infection is attributed to public mobility, person to person  
119 transmission and through respiratory droplets or direct contact but certain climatic factors also play  
120 pivotal role in spread of virus (Chen et al., 2020). Meteorological factors effecting the viability  
121 and spread of virus associated respiratory infections like SARS involve ambient temperature,  
122 humidity, population size and wind speed as reported by recent epidemiological studies (Dalziel  
123 et al., 2018; Ma et al., 2020; Tan et al., 2005). Stability of droplet and survival of coronavirus is  
124 dependent on air temperature as well as humidity (Chan et al., 2011). Recently, Tosepu et al.,  
125 studied correlation of weather parameters and COVID-19 pandemic and reported positive linear  
126 correlation between average temperature and cases of COVID-19 in China and Indonesia (Tosepu  
127 et al., 2020; Zhu and Xie, 2020). Wang et al. reported effect of temperature on spread and mortality  
128 of COVID-19 while Metz and co-workers examined correlation of humidity with survival of virus  
129 (Metz and Finn, 2015; Wang et al., 2020).

130 Keeping in view, the significant correlation of climatological conditions with spread of  
131 COVID-19, the current study aimed to reveal correlation of COVID-19 pandemic and  
132 meteorological parameters including humidity, temperature, rainfall, wind speed and population  
133 size. Furthermore, ROC analysis was employed to investigate sensibility and sensitivity of  
134 population size, temperature average, temperature minimum, and wind speed on the transmission  
135 rate of the novel coronavirus in highly infected cities of Pakistan i.e. Karachi, Lahore and Peshawar  
136 to interlink relationship of their effects with COVID-19 mortality.

137

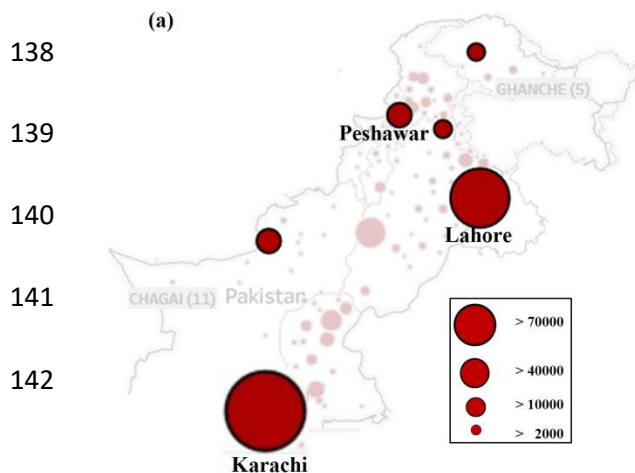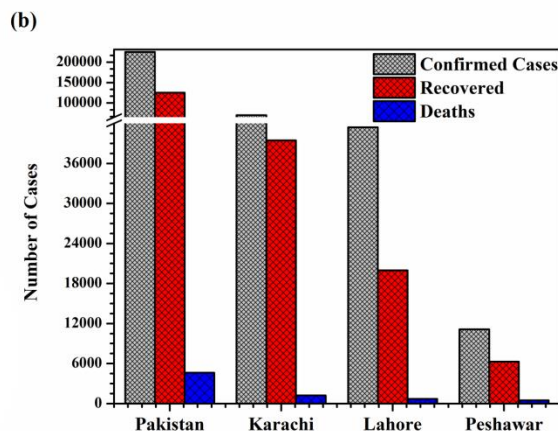

143 **Figure 2:** (a) COVID-19 epidemic in various cities of Pakistan and (b) numerical values for the  
144 total number of cases as on July 4, 2020.

## 145 **2. Materials and Methods:**

### 146 **2.1 Data Collection**

147 Data set of COVID-19 in Pakistan for the period of April 9 to June 9, 2020 was collected  
148 from the official website of National Institute of Health (<https://www.nih.org.pk/>) and daily  
149 confirmed cases of three highly infected cities (Lahore, Karachi and Peshawar) of Pakistan were  
150 gathered from online COVID-19 data archive (<https://public.tableau.com/>). The location and  
151 number of cases of highly infected cities including Lahore, Karachi and Peshawar are shown in  
152 Fig. 2A while, the weather data was taken from (<https://weatherspark.com/>) and  
153 (<https://www.timeanddate.com/>). The targeted climate variables are temperature minimum (°F),  
154 temperature maximum (°F), temperature average (°F), humidity (%), rainfall (mm) and windfall  
155 (mph). Population data of targeted cities were collect on the official website of Pakistan bureau of  
156 statistics (<http://www.pbs.gov.pk/>).

### 157 **2.2 Spearman's correlation test**

158 The collected data was analyzed by spearman's rank correlation coefficient ( $r_s$ ) or Spearman's rho  
159 ( $\rho$ ) to determine the appropriate relationship between climatic variables and COVID-19 cases of  
160 targeted cities. It is similar to Pearson correlation coefficient and is non-parametric test that  
161 analyzes how well the association between two variables can be defined using a monotonic  
162 function. The correlation coefficient values of  $\pm 1$  represents perfect degree of association between  
163 the two variables i.e. values closer to  $\pm 1$  means stronger correlation while value near 0 means  
164 weaker correlation.

165 Given that the data used in this study are not normally distributed, it is appropriate to use  
166 correlation coefficients for the analyses that can be calculated via the following equation.

$$167 \quad r_s = 1 - 6 \frac{\sum d_i^2}{n(n^2 - 1)}$$

168 where n represents the number of alternatives, and  $d_i$  is the difference between the ranks of two  
169 parameters. All statistical analysis was performed using Microsoft excel 2010.  
170

171

## 172 **2.3 The analysis of receiver operating characteristics (ROC)**

173 A probability curve known as receiver operating characteristic (ROC) curve has been widely  
174 employed for comparison between two operating characteristics i.e. true positive rate (TPR) or  
175 sensitivity and false positive rate (FPR) or specificity at different threshold settings (Hanley, 1989;  
176 Swets, 1979). Area under ROC curve an effective measure of accuracy is employed in current  
177 study to confirm correlation of climatic factors including temperature average (TA), temperature  
178 minimum (TM), wind speed (WS), and population size (PS) with transmission of COVID-19.  
179 GraphPad Prism software version 7.0 (GraphPad, Inc., San Diego, CA, USA, [www.graphpad.com](http://www.graphpad.com))  
180 is employed for ROC analysis while AUC was determined with 95% confidence intervals (CI).  
181 The AUC value for a perfect model is 1, worthless model is 0.5 and imperfect model is 0. The  
182 ROC curve is also referred as 1-specificity and sensitivity curve.

## 183 **3. Results and Discussion:**

184 In Pakistan, first diagnosed case of COVID-19 has been confirmed on February 26, 2020  
185 (Waris et al., 2020). A rapid increase in confirmed cases of COVID-19 were observed from March  
186 16, 2020 onward, and on July 4, 2020 the total confirmed cases reached 225,282 as shown in Fig.  
187 2B. The total number of confirmed cases, deaths and recoveries of three most infected cities such  
188 as Lahore Karachi and Peshawar of Pakistan until July 4, 2020 are also provided (Fig. 2B).

189 Fig. 3 shows the data of COVID-19 cases and climatic factors including temperature average,  
190 humidity and wind speed of selected cities. During this observation period (April 9, 2020 to June  
191 9, 2020), total number of confirmed cases from selected cities were > 57000 with average daily  
192 number as 303. The average daily mean values of climatic factors considered in current study such  
193 as temperature minimum, temperature maximum, temperature average, rainfall, humidity average  
194 and wind speed were 73.3 °F, 92.8 °F, 83.0 °F, 17.2 mm, 53.6 % and 9.1 mph, respectively.

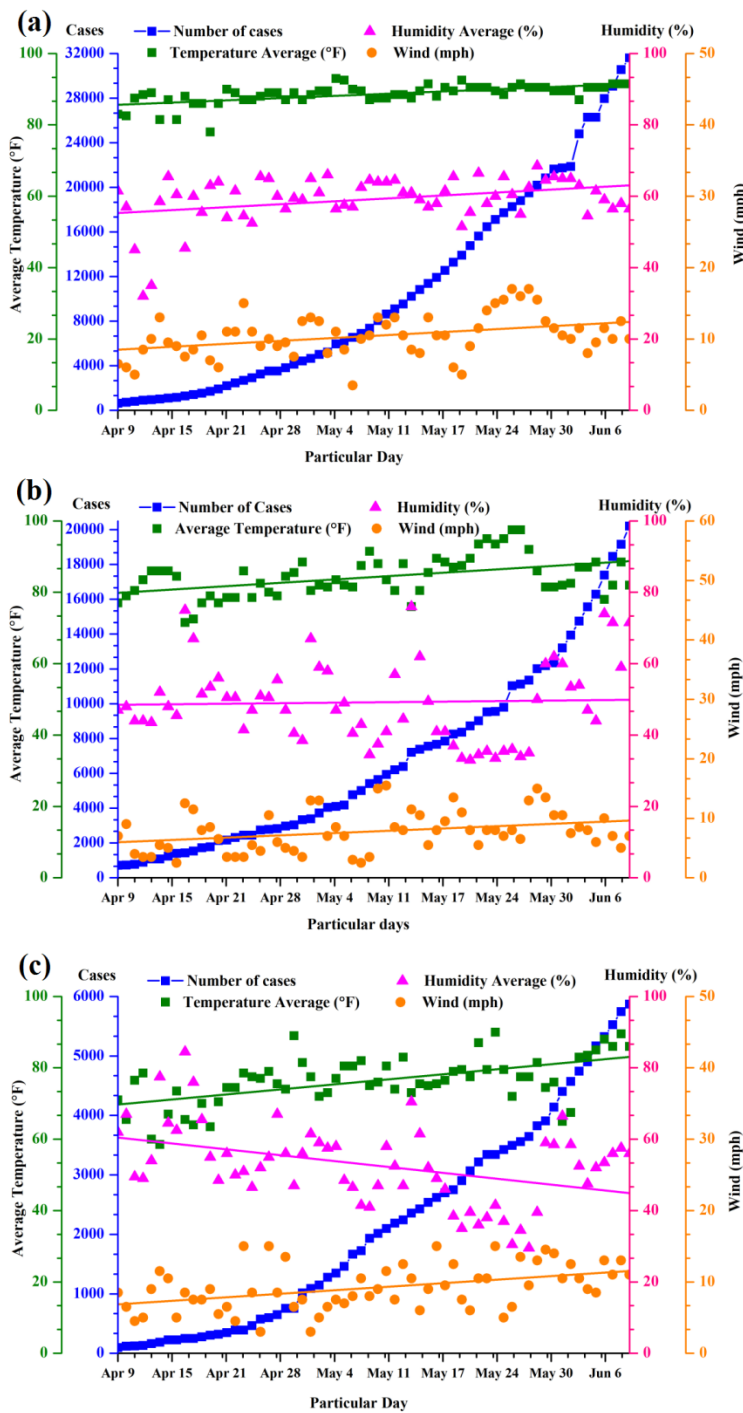

195

196 **Figure 3:** Daily confirmed cases of COVID-19 with climatic factors (Average temperature, wind  
197 speed and average humidity) in Pakistani cities (a) Karachi, (b) Lahore and (c) Peshawar from  
198 April 9, 2020 to June 9, 2020.



199 Table 1 summarizes the spearman’s correlation coefficient between daily COVID-19  
 200 confirmed cases and climatic variables along with population of selected cities. The result indicates  
 201 significant correlation of confirmed cases with minimum temperature, average temperature and  
 202 wind speed for each city while relative humidity is slightly correlated to the cases of Karachi.  
 203 Finally, as expected, population of each city is strongly correlated with their number of cases.  
 204 Among selected cities, Karachi is most infected by COVID-19, as assured by resulted statistical  
 205 relationship of the number of cases with minimum temperature, average temperature, wind speed  
 206 and population.

207 **Table 1:** Spearman’s correlation coefficient between daily COVID-19 confirmed cases and  
 208 climatic variables along with population of selected cities in Pakistan.

| Sr. No | Climatic variables       | Lahore  | Karachi | Peshawar |
|--------|--------------------------|---------|---------|----------|
| 1      | Temperature Minimum (°F) | 0.33*   | 0.68*   | 0.30*    |
| 2      | Temperature Maximum (°F) | 0.21    | 0.11*** | 0.26**   |
| 3      | Temperature Average (°F) | 0.37**  | 0.56*   | 0.35*    |
| 4      | Rainfall (mm)            | 0.19*** | -0.07   | -0.72*   |
| 5      | Humidity average (%)     | 0.07    | 0.10    | -0.19*** |
| 6      | Wind speed (mph)         | 0.20    | 0.35*   | 0.17***  |
| 7      | Population               | 0.70*   | 0.75*   | 0.65*    |

209 \* Correlation is significant at the 0.01, 0.05 and 0.1 level, respectively (2-tailed).

210 ROC analysis was originated in early 1950’s and provides an efficient method to evaluate  
 211 accuracy of a test using intrinsic measures like sensitivity, and specificity. ROC curve (sensitivity  
 212 versus 1-specificity plot) and area under ROC curve represents a reliable tool for performance  
 213 measurement of test to (i) find out optimal cut off values, and (ii) comparison between alternative  
 214 diagnostic tasks applied on same subject (Hajian-Tilaki, 2013; Hanley and McNeil, 1982; Hanley  
 215 and McNeil, 1983). The ROC curve is utilized in current study for sensitivity and specificity  
 216 analysis over three climatological parameters namely temperature average, temperature minimum  
 217 and wind speed along with population size in highly effected cities of Pakistan. ROC curves for  
 218 transmission rate of COVID-19 based on variation in various parameters in selected cities are  
 219 depicted in Figure 4 where, the design variable is shown on horizontal axis and sensitivity of same  
 220 variable is represented on vertical axis.

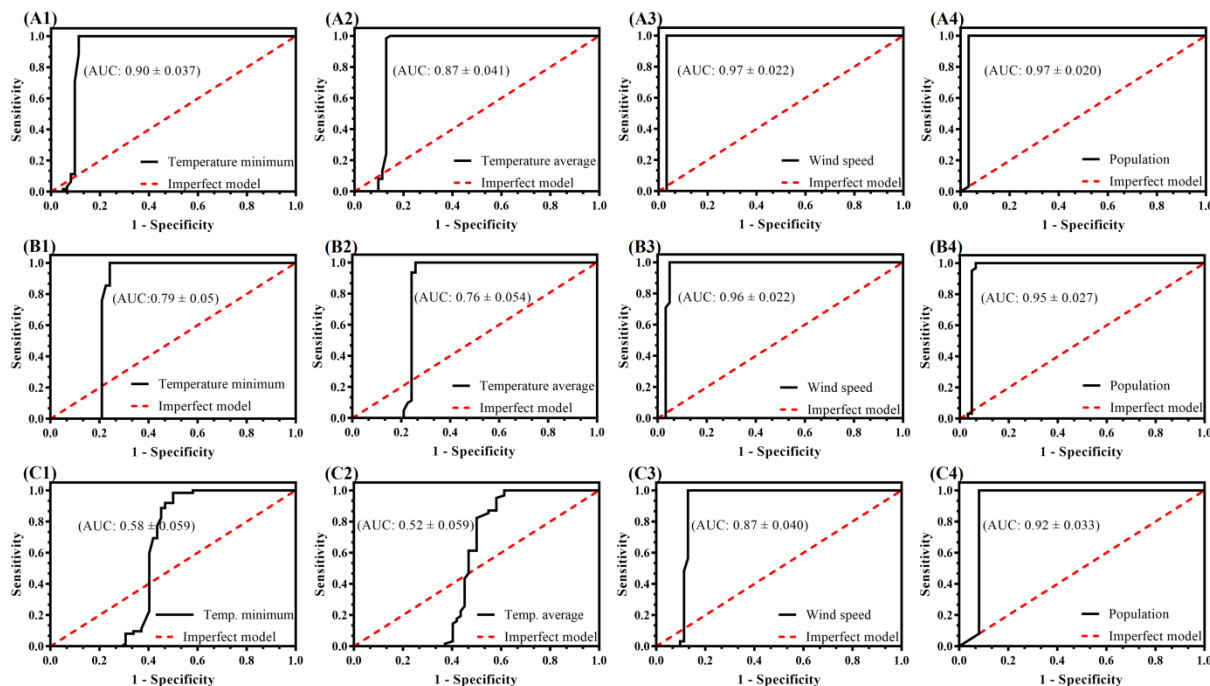

221

222 **Figure 4:** The ROC curve of the transmission rate of COVID-19 based on the various  
 223 meteorological factors (TM, TA, and WS) and PS in Pakistani cities (a) Karachi, (b) Lahore and  
 224 (c) Peshawar from April 9, 2020 to June 9, 2020. Specificity represents the true negative rate and  
 225 sensitivity represents the true positive rate.

226 Figure 4 revealed that both WS and PS model with AUC value 0.9 have high sensitivity and can  
 227 distinguish positive and negative classes for all selected cities. Similarly, TA and TM models  
 228 generated for highly effected city i.e. Karachi with AUC value of 0.8 and 0.9, respectively also  
 229 have good sensitivity and accurately distinguish both classes. In addition, TA and TM models for  
 230 Lahore (second highly effected city) with AUC value 0.7 has moderate sensitivity while in case of  
 231 Peshawar the generated TA and TM models have worst sensitivity (AUC: 0.5) as given in Table  
 232 2. The nonlinear relationship of TA, TM and PS parameters with number of COVID-19 infected  
 233 people confirmed sensitivity and direct correlation of COVID-19 transmission with these  
 234 parameters.

235

236 **Table 2:** The area under curve of the transmission rate of COVID-19 based on the various  
 237 meteorological factors and population of selected cities in Pakistan.

| Sr. No | Parameters | Karachi      |          |          | Lahore     |          |          | Peshawar    |          |          |
|--------|------------|--------------|----------|----------|------------|----------|----------|-------------|----------|----------|
|        |            | AUC          | 95% CI   |          | AUC        | 95% CI   |          | AUC         | 95% CI   |          |
|        |            |              | Lo Limit | Up Limit |            | Lo Limit | Up Limit |             | Lo Limit | Up Limit |
| 1      | Temp Min   | 0.90 ± 0.037 | 0.83     | 0.97     | 0.79±0.051 | 0.68     | 0.89     | 0.58±0.059* | 0.47     | 0.71     |
| 2      | Temp Avg   | 0.87 ± 0.041 | 0.79     | 0.96     | 0.76±0.054 | 0.65     | 0.86     | 0.52±0.059* | 0.41     | 0.64     |
| 3      | Wind speed | 0.97±0.022   | 0.92     | 1.01     | 0.96±0.022 | 0.92     | 1.01     | 0.87±0.040  | 0.80     | 0.96     |
| 4      | Population | 0.97±0.020   | 0.92     | 1.01     | 0.95±0.027 | 0.89     | 1.00     | 0.92±0.033  | 0.86     | 0.99     |

238 Temp Min, Temperature minimum; Temp Avg, Temperature average; AUC, Area under curve;  
 239 CI, Confidence interval; Lo, Lower; Up, Upper  
 240 Correlation is significant at the <0.05 level

241 In this study, we explore the statistical relationship between climatic variables and COVID-19  
 242 cases by spearman’s correlation coefficient method followed by ROC curves analysis to  
 243 investigate the sensitivity of TA, TM, WS and PS on transmission rate of COVID-19 aerosol  
 244 droplets in highly afflicted cities of Pakistan. Airborne transmission also termed as “droplet based  
 245 transmission” of infectious agent (i.e. COVID-19) is responsible for unexpected escalation of this  
 246 epidemic around the globe. Aerosols are liquid or solid particle suspension with virus encapsulated  
 247 inside and pose high threat towards disease spread (Judson and Munster, 2019; Morawska, 2005).  
 248 The viability and survival of these viral encapsulated droplets is effected by various environmental  
 249 factors namely temperature variations, wind speed, humidity, and sunlight. Infectivity of virus (i.e.  
 250 COVID-19; size< 100 nm) encapsulated aerosols depends mainly on stress caused by temperature  
 251 along with other environmental factors (Kumar and Morawska, 2020; Marthi, 1994). Association  
 252 of temperature with spread of viral particles has been extensively reported suggesting direct  
 253 relation of temperature with viability and infectivity rate of different viral infections. Tan et al.,  
 254 reported higher rate of SARS-CoV cases in places of minimum and ambient temperature zone  
 255 (Tan et al., 2005). Current study suggested that minimum and average air temperature facilitate  
 256 the spread and transmission of this SARS-CoV-2 embedded inside aerosol particles and has  
 257 positive correlation with the increasing number of COVID-19 cases. Our findings are in agreement  
 258 with the previous reports of (Biswas et al., 2014; Harper, 1961; Shaman and Kohn, 2009; Van  
 259 Doremalen et al., 2013) suggesting more survival rate of SARS-CoV, MERS-CoV and other  
 260 influenza virus in low temperature zone and corresponding increase in viral pandemic. Best  
 261 correlation of temperature minimum and temperature average with number of COVID-19 cases

262 was observed in case of Karachi (highly effected city of Pakistan) where evaporation is an  
263 important physiochemical process that affect fate of COVID-19 droplets. Recent studies of Tosepu  
264 et al., 2020 support our findings that elucidated the significant correlation between average  
265 temperature and COVID-19 cases. Similarly, negative correlation observed in case of rainfall and  
266 average humidity in current study are also supported by previous studies of Tan et al 2010 and  
267 Metz & Finn et al indicating inverse relation of these variables with number of cases (Metz and  
268 Finn, 2015; Tan et al., 2005). Negative correlation observed in case of average humidity in current  
269 study is consistent with work reported by Chan et al., 2011 suggesting inverse relation among  
270 humidity and SARS coronavirus cases (Chan et al., 2011). Impact of climate on the number of  
271 COVID-19 cases in various countries has been reported previously by various research groups to  
272 explain the statistical interaction (Bashir et al., 2020; Şahin, 2020; Tosepu et al., 2020; Zhu and  
273 Xie, 2020). Furthermore, studies reported over COVID-19 epidemic from China also suggested  
274 strong correlation of coronavirus cases and various climatic parameters particularly, temperature  
275 and humidity (Sajadi et al., 2020).

276 Wind speed is another important climatic factor that facilitate the spread of infectious diseases like  
277 SARS-CoV, COVID-19 and influenza virus (Bashir et al., 2020; Yuan et al., 2006). Positive  
278 correlation of wind speed with COVID-19 spread is observed in current study suggesting role of  
279 wind for spread of COVID-19 aerosol particles to distance far from their origin. Furthermore, the  
280 ROC curve analysis (AUC value range 0.8 to 0.9) also showed good sensitivity of wind speed with  
281 number of COVID-19 cases in selected cities of Pakistan.

282 Population size (PS) is reported as major transmittability factor for COVID-19 and showed  
283 positive association with COVID-19 epidemic as depicted in Figure 2 while ROC curve analysis  
284 also confirmed sensitivity of PS towards spread of COVID-19. These findings are comparable to  
285 previous studies of Mehdi et al., that showed strong correlation of PS with number of COVID-19  
286 cases (Jahangiri et al., 2020). Role of temperature (i.e. minimum and average), wind speed and  
287 population size on COVID-19 spread along with its survival rate and transmission risk on surfaces  
288 and air, respectively is well-documented. Therefore, sensitivity analysis of these parameters over  
289 transmission rate of COVID-19 in selected cities of Pakistan is crucial for government agencies to  
290 devise improved safety measures for survival of people. Owing to significance of PS parameter  
291 towards COVID-19 pandemic, more strict actions and control measures are suggested for highly

292 populated cities to control devastating effects of COVID-19. Although our findings suggested  
293 strong correlation of COVID-19 epidemic and various meteorological parameters involving  
294 extensive data analysis from various cities of Pakistan. Still, current study has certain limitations  
295 as we did not consider other factors like personal hygiene, people mobility and endurance that  
296 need to be considered in further studies.

## 297 **Conclusions:**

298 Transmission of COVID-19 droplets and aerosols emitted by cough or sneeze of COVID-19  
299 infected person is affected by various environmental factors along with population size. Current  
300 study investigated correlation of COVID-19 epidemic with different meteorological parameters  
301 particularly, temperature, wind speed, and population size of various cities of Pakistan. Unique  
302 characteristics of COVID-19 aerosols being more viable with long survival time in air pose more  
303 threat towards its spread. Our findings indicated significant correlation between temperature (i.e.  
304 TA and TM) and population size (PS) with COVID-19 pandemic. Furthermore, ROC curves were  
305 used to analyze the sensitivity of TA, TM, WS and PS on transmission rate of COVID-19 aerosol  
306 particles in highly afflicted cities of Pakistan. The results showed non-linear relationship of TA,  
307 TM and PS with number of people effected from COVID-19 in selected cities of Pakistan and  
308 sensitivity of all selected parameters with COVID-19 transmission. Results of current study  
309 suggest temperature variation and population size as important factors affecting the COVID-19  
310 epidemic and can be used by government authorities to devise policy to suppress epidemic in  
311 Pakistan.

## 312 **Acknowledgement:**

313 The authors thank Dr. Hafiz Muhammad Adnan Hamed and Muhammad Zahid for scientific  
314 discussions. Junaid Haider is thankful to “CAS-TWAS President’s Fellowship for International  
315 PhD Students”.

316

## 317 **Author contribution:**

318 IS, AS and JH designed concept of current study, arranged data from various resources and applied  
319 statistical analysis. SN, IS and AH analyzed data, compiled information and wrote manuscript.  
320 RMA, HRS and IMK contributed literature, and analyzed data. MI reviewed manuscript drafts,

321 finalized formatting and supervised the study. All authors have given approval to the final version  
322 of the manuscript.

### 323 **Conflict of interest:**

324 The authors declare no conflict of interest.

### 325 **References:**

- 326
- 327 Ali, I., 2020 Pakistan confirms first two cases of coronavirus, govt says “no need to panic”. DAWN,  
328 2020.
- 329 Bashir, M.F., Ma, B., Komal, B., Bashir, M.A., Tan, D., Bashir, M., 2020. Correlation between  
330 climate indicators and COVID-19 pandemic in New York, USA. *Sci. Total. Environ.* 728,  
331 138835.
- 332 Biswas, P.K., Islam, M.Z., Debnath, N.C., Yamage, M., 2014. Modeling and roles of  
333 meteorological factors in outbreaks of highly pathogenic avian influenza H5N1. *PloS one*  
334 9, e98471.
- 335 Chan, K., Peiris, J., Lam, S., Poon, L., Yuen, K., Seto, W., 2011. The effects of temperature and  
336 relative humidity on the viability of the SARS coronavirus. *Adv. Virol.* 2011, 734690.
- 337 Chen, B., Liang, H., Yuan, X., Hu, Y., Xu, M., Zhao, Y., et al. Roles of meteorological conditions  
338 in COVID-19 transmission on a worldwide scale. *MedRxiv* 2020.
- 339 Dalziel, B.D., Kissler, S., Gog, J.R., Viboud, C., Bjørnstad, O.N., Metcalf, C.J.E., et al. 2018.  
340 Urbanization and humidity shape the intensity of influenza epidemics in US cities. *Science*  
341 362, 75-79.
- 342 Graham, R.L., Donaldson, E.F., Baric, R.S., 2013. A decade after SARS: strategies for controlling  
343 emerging coronaviruses. *Nat. Rev. Microbiol.* 11, 836-848.
- 344 Grayson, S.A., Griffiths, P.S., Perez, M.K., Piedimonte, G., 2017 Detection of airborne respiratory  
345 syncytial virus in a pediatric acute care clinic. *Pediatr. pulmonol.* 52, 684-688.
- 346 Guan, W-j., Ni, Z-y., Hu, Y., Liang, W-h., Ou, C-q., He, J-x., et al., 2020. Clinical characteristics  
347 of coronavirus disease 2019 in China. *N. Engl. J. Med.* 382, 1708-1720.
- 348 Hajian-Tilaki, K., 2013. Receiver operating characteristic (ROC) curve analysis for medical  
349 diagnostic test evaluation. *Caspian. J. Intern. Med.* 4, 627.

- 350 Hanley, J.A., 1989. Receiver operating characteristic (ROC) methodology: the state of the art. Crit.  
351 Rev. Diagn. Imaging. 29, 307-335.
- 352 Hanley, J.A., McNeil, B.J., 1982. The meaning and use of the area under a receiver operating  
353 characteristic (ROC) curve. Radiology 143, 29-36.
- 354 Hanley, J.A., McNeil, B.J., 1983. A method of comparing the areas under receiver operating  
355 characteristic curves derived from the same cases. Radiology 148, 839-843.
- 356 Harper, G., 1961. Airborne micro-organisms: survival tests with four viruses. Epidemiol. Infect.  
357 59, 479-486.
- 358 Huang, C., Wang, Y., Li, X., Ren, L., Zhao, J., Hu, Y., et al., 2020. Clinical features of patients  
359 infected with 2019 novel coronavirus in Wuhan, China. The lancet 395, 497-506.
- 360 Jahangiri, M., Jahangiri, M., Najafgholipour, M., 2020. The sensitivity and specificity analyses of  
361 ambient temperature and population size on the transmission rate of the novel coronavirus  
362 (COVID-19) in different provinces of Iran. Sci. Total. Environ, 138872.
- 363 Jayaweera, M., Perera, H., Gunawardana, B., Manatunge, J., 2020. Transmission of COVID-19  
364 virus by droplets and aerosols: A critical review on the unresolved dichotomy. Environ.  
365 Res, 109819.
- 366 Judson, S.D., Munster, V.J., 2019. Nosocomial transmission of emerging viruses via aerosol-  
367 generating medical procedures. Viruses 11, 940.
- 368 Kumar, P., Morawska, L., 2020. Could fighting airborne transmission be the next line of defence  
369 against COVID-19 spread? City and Environment Interactions, 100033.
- 370 Li, Q., Guan, X., Wu, P., Wang, X., Zhou, L., Tong, Y., et al., 2020. Early transmission dynamics  
371 in Wuhan, China, of novel coronavirus–infected pneumonia. N. Engl. J. Med. 382, 1199-  
372 1207.
- 373 Lipsitch, M., Swerdlow, D.L., Finelli, L., 2020. Defining the epidemiology of Covid-19—studies  
374 needed. N. Engl. J. Med. 382, 1194-1196.
- 375 Liu, L., Wei, J., Li, Y., Ooi, A., 2017. Evaporation and dispersion of respiratory droplets from  
376 coughing. Indoor Air 27, 179-190.
- 377 Ma, Y., Zhao, Y., Liu, J., He, X., Wang, B., Fu, S., et al. 2020. Effects of temperature variation  
378 and humidity on the death of COVID-19 in Wuhan, China. Sci. Total. Environ, 138226.
- 379 Marthi, B., 1994. Resuscitation of microbial bioaerosols. Atmospheric microbial aerosols.  
380 Springer, 192-225.

- 381 Metz, J.A., Finn, A., 2015. Influenza and humidity—Why a bit more damp may be good for you!.  
382 J. Infect. 71, S54-S58.
- 383 Morawska, L., 2005. Droplet fate in indoor environments, or can we prevent the spread of infection?  
384 Proceedings of Indoor Air 2005: the 10th International Conference on Indoor Air Quality  
385 and Climate. Springer, 2005, 9-23.
- 386 Nicas, M., Nazaroff, W.W., Hubbard, A., 2005. Toward understanding the risk of secondary  
387 airborne infection: emission of respirable pathogens. J. Occup. Environ. Hyg. 2, 143-154.
- 388 Noreen, N., Dil, S., Niazi, S.K., Naveed, I., Khan, N.U., Khan, F.K., et al., 2020. Coronavirus  
389 disease (COVID-19) Pandemic and Pakistan; Limitations and Gaps.
- 390 World Health Organization (WHO) 2020. Critical preparedness, readiness and response actions  
391 for COVID-19: interim guidance, 19 March 2020.
- 392 Remuzzi, A., Remuzzi, G., COVID-19 and Italy: what next? The Lancet 2020.
- 393 Rothan, H.A., Byrareddy, S.N., 2020. The epidemiology and pathogenesis of coronavirus disease  
394 (COVID-19) outbreak. J. Autoimmun. 109, 102433.
- 395 Şahin, M., 2020. Impact of weather on COVID-19 pandemic in Turkey. Sci. Total. Environ. 728,  
396 138810.
- 397 Sajadi, M.M., Habibzadeh, P., Vintzileos, A., Shokouhi, S., Miralles-Wilhelm, F., Amoroso, A.,  
398 2020. Temperature and latitude analysis to predict potential spread and seasonality for  
399 COVID-19. Available at SSRN 3550308.
- 400 Saqlain, M., Munir, M.M., Ahmed, A., Tahir, A.H., Kamran, S., 2020. Is Pakistan prepared to  
401 tackle the coronavirus epidemic? Drugs. Ther. Perspect, 1-2.
- 402 Shaman, J., Kohn, M., 2009. Absolute humidity modulates influenza survival, transmission, and  
403 seasonality. Proc. Natl. Acad. Sci. 106, 3243-3248.
- 404 Song, F., Shi, N., Shan, F., Zhang, Z., Shen, J., Lu, H., et al. 2020. Emerging 2019 novel  
405 coronavirus (2019-nCoV) pneumonia. Radiology 295, 210-217.
- 406 Swets, J.A., 1979. ROC analysis applied to the evaluation of medical imaging techniques. Invest.  
407 Radiol. 14, 109-121.
- 408 Tan, J., Mu, L., Huang, J., Yu, S., Chen, B., Yin, J., 2005. An initial investigation of the association  
409 between the SARS outbreak and weather: with the view of the environmental temperature  
410 and its variation. J. Epidemiol. Commun. H. 59, 186-192.



- 411 Tellier, R., 2009. Aerosol transmission of influenza A virus: a review of new studies. *J. R. Soc.*  
412 *Interface* 6, S783-S790.
- 413 Tosepu, R., Gunawan, J., Effendy, D.S., Lestari, H., Bahar, H., Asfian, P., 2020. Correlation  
414 between weather and Covid-19 pandemic in Jakarta, Indonesia. *Sci. Total. Environ.* 725,  
415 138436.
- 416 Van Doremalen, N., Bushmaker, T., Morris, D.H., Holbrook, M.G., Gamble, A., Williamson, B.N.,  
417 et al., 2020. Aerosol and surface stability of SARS-CoV-2 as compared with SARS-CoV-  
418 1. *N. Engl. J. Med.* 382, 1564-1567.
- 419 Van Doremalen, N., Bushmaker, T., Munster, V., 2013. Stability of Middle East respiratory  
420 syndrome coronavirus (MERS-CoV) under different environmental conditions.  
421 *Eurosurveillance* 18, 20590.
- 422 Wang, M., Jiang, A., Gong, L., Luo, L., Guo, W., Li, C., et al., 2020. Temperature significant  
423 change COVID-19 Transmission in 429 cities. *MedRxiv* 2020.
- 424 Waris, A., Khan, A.U., Ali, M., Ali, A., Baset, A., 2020. COVID-19 outbreak: current scenario of  
425 Pakistan. *New. Microbes. New. Infect.*, 100681.
- 426 Xie, X., Li, Y., Chwang, A., Ho, P., Seto, W., 2007. How far droplets can move in indoor  
427 environments—revisiting the Wells evaporation–falling curve. *Indoor air* 17, 211-225.
- 428 Yang, P., Wang, X., 2020. COVID-19: a new challenge for human beings. *Cell. Mol. Immunol.*  
429 17, 555-557.
- 430 Yuan, J., Yun, H., Lan, W., Wang, W., Sullivan, S.G., Jia, S., et al., 2006. A climatologic  
431 investigation of the SARS-CoV outbreak in Beijing, China. *Am. J. Infect. Control* 34, 234-  
432 236.
- 433 Zhu, H., Wei, L., Niu, P., 2020. The novel coronavirus outbreak in Wuhan, China. *Global health*  
434 *research and policy* 5, 1-3.
- 435 Zhu, Y., Xie, J., 2020. Association between ambient temperature and COVID-19 infection in 122  
436 cities from China. *Sci. Total. Environ.* 724, 138201.

437

438

439
